# Supplementary material for: Universal point-of-care detection of proteins based on proximity hybridization-mediated isothermal exponential amplification
Source: Royal Society of Chemistry journal article supplement (doi:10.1039/d1an02245h), 2022-01-01
Supplement: d1an02245h3.pdf [file d1an02245h3.pdf]

Electronic Supplementary Information

**Universal point-of-care detection of protein based on  
proximity hybridization-mediated isothermal exponential  
amplification**

Zibin Tang, ‡<sup>a</sup> Wenyong Zhao, ‡<sup>b</sup> Yuling Deng, ‡<sup>a</sup> Yuanzhong Sun,<sup>a</sup> Cailing Qiu,<sup>c</sup> Binhua Wu,<sup>d</sup> Juan Bao,<sup>a</sup> Zhangquan Chen,<sup>\*a</sup> and Luxin Yu<sup>\*a</sup>

*a. Medical Technology college, Guangdong Medical University,  
Dongguan 523808, PR China*

*b. Faculty of Forensic Medicine, School of Basic Medicine, Guangdong  
Medical University, Dongguan 523808, China*

*c. Department of Medical Laboratory, Dalang hospital of Dongguan,  
Dongguan 523770, China*

*d. Marine Biomedical Research Institute of Guangdong Medical  
University, 524023, Zhanjiang PR China*

‡ These authors contributed equally to this work.

Fax: +86 76922896373; Tel: +86 76922896373;

E-mail: [yuluxin2006@163.com](mailto:yuluxin2006@163.com), [zqchen@gdmu.edu.cn](mailto:zqchen@gdmu.edu.cn)

### **Preparation of anti-digoxin antibody-AuNP conjugates**

Conjugation reactions were performed by adding 20  $\mu\text{L}$  of 1 mg/ml anti-digoxin antibody to 2 mL of a tenfold-concentrated AuNP solution (pH 8.4), followed by incubation at room temperature with gentle shaking for 1 h. Then a 10% wt/vol BSA stock solution (pH 7.0) was added to the AuNP solution to a final concentration of 1% wt/vol. After incubation at room temperature for one hour, the resulting AuNP solution was concentrated by centrifugation for 30 min at  $13\,400 \times g$ . The supernatant was discarded without disturbing the pellet. The pellet was resuspended with 100  $\mu\text{L}$  of suspension solution comprising 20 nM  $\text{Na}_3\text{PO}_4$ , 10% BSA, and 0.05%  $\text{NaN}_3$  and stored at 4  $^\circ\text{C}$

### **preparation of hairpin solution**

Before DNA assay, three kinds of hairpin probes (10  $\mu\text{M}$  in HEPES buffer) was heated to 95 $^\circ\text{C}$  for 5 min, allowed to cool down at the rate of 1  $^\circ\text{C s}^{-1}$  to 65 $^\circ\text{C}$  for 5 min, and then continued to cool down at the rate of 1  $^\circ\text{C s}^{-1}$  to room temperature (25 $^\circ\text{C}$ ) for 2 h to form the stem-loop hairpin structure. The obtained solution was stored at 4  $^\circ\text{C}$  for further use.

### **Gel electrophoresis**

Gel electrophoresis of different reaction product was conducted with a 4% gel (3% NuSeive GTG agarose + 1% agarose) prepared in 1  $\times$  TBE buffer (89 mmol/L Tris; 89 mmol/L Boric acid; 2 mmol/L EDTA pH 8.3) at 65 V constant voltage for about 75 min. After the gel was stained for 30 min in a 4S GelRed solution, it was photographed by FluorChem FC3 Chemiluminescent imaging system. (ProteinSimple, USA).

### **Optimization of detection conditions**

The hairpin probes used in this assay must be treated to form stem-loop structure.

AS shown in the Fig. S1, the untreated hairpin probe 2 (H2) formed self-dimer (lane 3, upper band about 60 bp). All the treated hairpin probes have formed stem-loop structure without self-dimers.

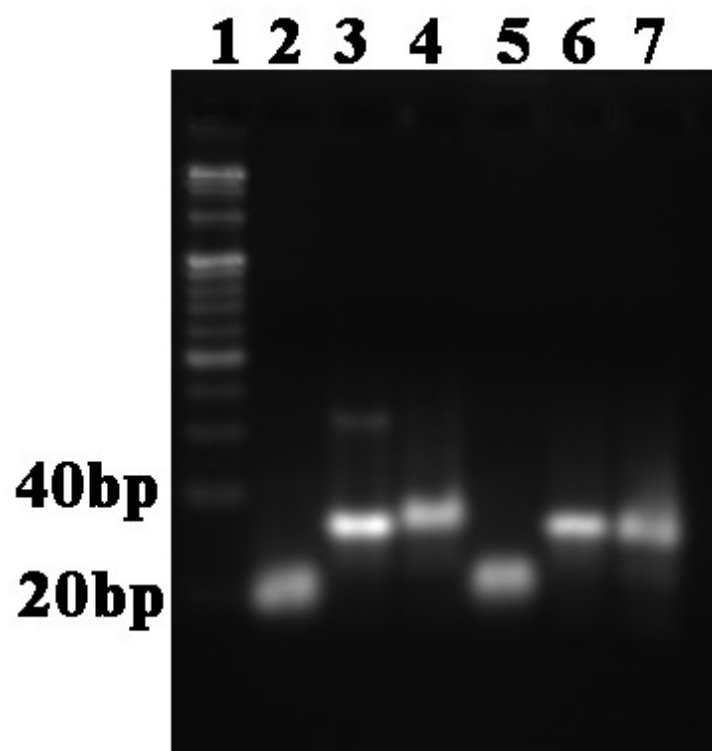

**Fig. S1** Gel electrophoresis analysis of treated and untreated hairpins. 1: DNA ladder, 2: untreated H1, 3: untreated H2, 4: untreated H3, 5: treated H1, 6: treated H2, 7: treated H3.

**Table S1** Comparison of our approach with other protein assay.

| Methods                  | Strategy                                                                 | LOD                      | Ref    |
|--------------------------|--------------------------------------------------------------------------|--------------------------|--------|
| Fluorescence             | Dropcast Single Molecule Assays                                          | 19 aM                    | [1, 2] |
| Electrochemiluminescence | Dual-Polar Electrochemiluminescence from Au 25 Nanoclusters              | 0.43 pg mL <sup>-1</sup> | [3, 4] |
| Electrochemical ELISA    | Protein Biosensing in Undiluted Serum Using a Polypyrrole-Based Platform | 78 pg mL <sup>-1</sup>   | [5]    |

|                 |                                             |                          |        |
|-----------------|---------------------------------------------|--------------------------|--------|
| Electrochemical | peptide inhibitor-based biosensing platform | 0.03 ng mL <sup>-1</sup> | [6, 7] |
|-----------------|---------------------------------------------|--------------------------|--------|

**Table S2** Spiking test in human serum and saliva samples.

| Sample | Spiked | Found    | Recovery | RSD  |
|--------|--------|----------|----------|------|
| serum  | 100 nM | 98.2 nM  | 98.2%    | 5.2% |
| serum  | 10 pM  | 10.5 pM  | 105.5%   | 6.2% |
| serum  | 100 fM | 96.2 fM  | 96.2%    | 5.5% |
| saliva | 100 nM | 99.3 nM  | 99.3%    | 4.3% |
| saliva | 10 pM  | 9.53 pM  | 95.3%    | 4.9% |
| saliva | 100 fM | 102.5 fM | 102.5%   | 6.0% |

All the data in the table represents the average of three measurements

[1] S. Yue, Y. Li, Z. Qiao, W. Song, S. Bi, Rolling Circle Replication for Biosensing, Bioimaging, and Biomedicine, *Trends in biotechnology*, 39 (2021) 1160-1172.

[2] C. Wu, P.M. Garden, D.R. Walt, Ultrasensitive Detection of Attomolar Protein Concentrations by Dropcast Single Molecule Assays, *Journal of the American Chemical Society*, 142 (2020) 12314-12323.

[3] Y. Zhou, Y. Chai, R. Yuan, Highly Efficient Dual-Polar Electrochemiluminescence from Au(25) Nanoclusters: The Next Generation of Multibiomarker Detection in a Single Step, *Analytical chemistry*, 91 (2019) 14618-14623.

[4] Z. Qiao, J. Zhang, X. Hai, Y. Yan, W. Song, S. Bi, Recent advances in templated synthesis of metal nanoclusters and their applications in biosensing, bioimaging and theranostics, *Biosensors & bioelectronics*, 176 (2021) 112898.

[5] S.K. Arya, P. Estrela, Electrochemical ELISA Protein Biosensing in Undiluted Serum Using a Polypyrrole-Based Platform, *Sensors (Basel, Switzerland)*, 20 (2020).

[6] F. Ma, Y. Zhu, Y. Chen, J. Liu, X. Zeng, Labeled and non-label electrochemical peptide inhibitor-based biosensing platform for determination of hemopexin domain of matrix metalloproteinase-14, *Talanta*, 194 (2019) 548-553.

[7] V. Vanova, K. Mitrevska, V. Milosavljevic, D. Hynek, L. Richtera, V. Adam, Peptide-based electrochemical biosensors utilized for protein detection, *Biosensors & bioelectronics*, 180 (2021) 113087.
