# Supplementary figures and images for: Universal point-of-care detection of proteins based on proximity hybridization-mediated isothermal exponential amplification
Source: Royal Society of Chemistry journal article supplement (doi:10.1039/d1an02245h), 2022-01-01

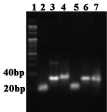

Supplement: d1an02245h2.pdf [file d1an02245h2.pdf]
